# Supplementary material
Source: PubMed Central journal article supplement (PMC8638399)
Supplement: ASN.2021040573SupplementaryData.pdf [file ASN.2021040573SupplementaryData.pdf]

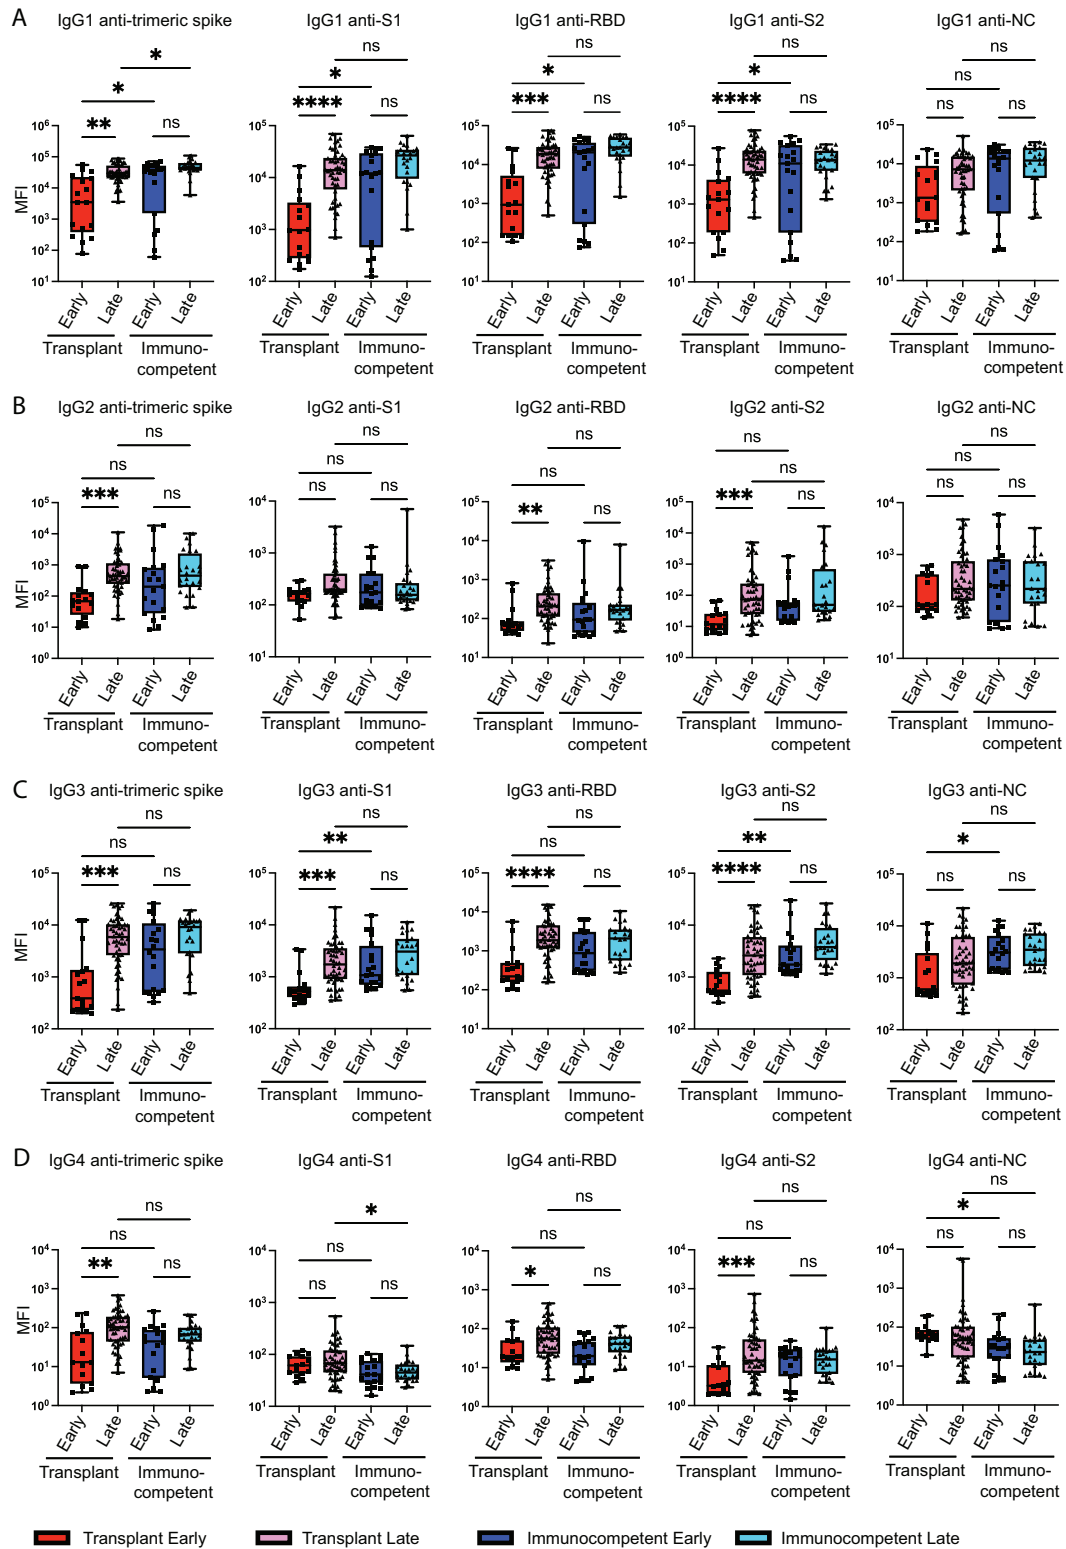

**Supplemental Figure 1: Measurement of IgG subtype antibodies specific for SARS-CoV-2**  
 Levels of (A) IgG1, (B) IgG2, (C) IgG3, and (D) IgG4 specific for the indicated epitopes of the SARS-CoV-2 Spike and nucleocapsid (NC) proteins. \* $<0.05$ , \*\* $<0.005$ , \*\*\* $<0.0005$ , \*\*\*\* $<0.0001$ , n.s. = not significant.

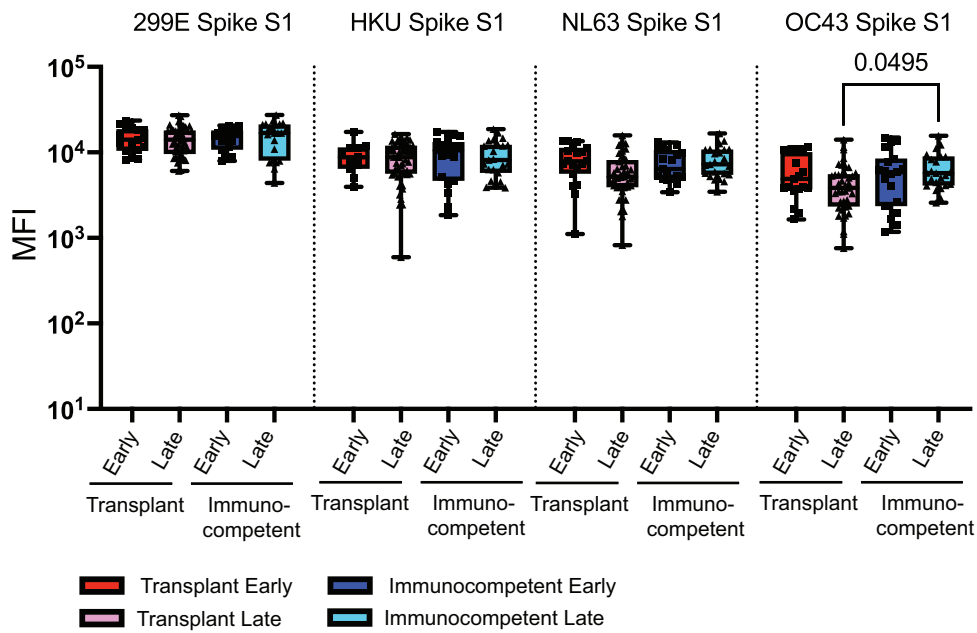

**Supplemental Figure 2: Measurement of IgG to common cold coronaviruses**

Antibodies specific for S1 domain of 229E, HKU1, NL63 or OC43 common cold coronaviruses. Serum is from dark red = transplant recipients ≤14 days after diagnosis, magenta = transplant recipients >14 days after diagnosis, dark blue = immunocompetent individuals ≤14 days after symptom onset, light blue = immunocompetent individuals >14 days after diagnosis. Only comparisons with a statistically significant difference are indicated.
